# Supplementary material
Source: publisher figshare collection journal article supplement (https://acs.figshare.com/ndownloader/files/5339209)
Supplement: Supplementary file 1 [file 5339209]

  
data_8+B(C6F5)4- 
  
_audit_creation_method            SHELXL-97 
_audit_update_record                   ?
#------------------------------------------------------------------------------
# PROCESSING SUMMARY (IUCr Office Use Only) 
_journal_date_recd_electronic          ?
_journal_date_from_coeditor            ?
_journal_date_accepted                 ?
_journal_coeditor_code                 ?
#------------------------------------------------------------------------------
# SUBMISSION DETAILS 
_publ_contact_author_name             ' Toshikazu Kitagawa '
_publ_contact_author_address
;
    Department of Chemistry for Materials, Graduate School of Engineering, 
    Mie University, Tsu, Mie 514-8507, Japan. 
;
_publ_contact_author_email            ' kitagawa@chem.mie-u.ac.jp'
_publ_contact_author_fax              ' +81-59-231-9416 '
_publ_contact_author_phone            ' +81-59-231-9416 '
_publ_contact_letter
;
    
;
_publ_requested_journal      ' J. Org. Chem.'
_publ_requested_category              ' CHOOSE FO or CO or EO '

_publ_requested_coeditor_name          ?
#------------------------------------------------------------------------------
# TITLE AND AUTHOR LIST 

_publ_section_title
;
Generation and Reaction of a Phenyl-Substituted Cyclopentadienyl
Cation Annelated with Two Homoadamantane Frameworks

;

_publ_section_title_footnote
;
    
;
loop_
_publ_author_name
_publ_author_footnote
_publ_author_address
' Kohei Ogawa '
;
  
;
;
    Institute for Chemical Research, Kyoto University, 
    Gokasho, Uji, Kyoto 611-0011, Japan. 
;
' Shinya Minegishi '
;
  
;
;
    Institute for Chemical Research, Kyoto University, 
    Gokasho, Uji, Kyoto 611-0011, Japan. 
;
' Koichi Komatsu '
;
  
;
;
    Department of Environmental and Biotechnological Frontier Engineering, 
    Fukui University of Technology, Gakuen, Fukui 910-8505, Japan. 
;
' Toshikazu Kitagawa '
;
  
;
;
    Department of Chemistry for Materials, Graduate School of Engineering, 
    Mie University, Tsu, Mie 514-8507, Japan. 
;
_publ_section_synopsis
;
  
;
#------------------------------------------------------------------------------
# TEXT 

_publ_section_abstract
;
    
;

_publ_section_comment
;
    
;

_publ_section_acknowledgements
;
    
;

_publ_section_references
;
Sheldrick, G.M. (1997). SHELXL97. Program for the refinement of 
crystal structures. Univ. of Goettingen, Germany.
;

_publ_section_figure_captions
;
    
;

_publ_section_exptl_prep
;
    
;

_publ_section_exptl_refinement
;
    
;
  

_chemical_name_systematic 
; 
 ? 
; 
_chemical_name_common             ? 
_chemical_melting_point           ? 
_chemical_formula_moiety          'C29 H33, F6 Sb' 
_chemical_formula_sum 
 'C29 H33 F6 Sb' 
_chemical_formula_weight          617.30 
  
loop_ 
 _atom_type_symbol 
 _atom_type_description 
 _atom_type_scat_dispersion_real 
 _atom_type_scat_dispersion_imag 
 _atom_type_scat_source 
 'C'  'C'   0.0033   0.0016 
 'International Tables Vol C Tables 4.2.6.8 and 6.1.1.4' 
 'H'  'H'   0.0000   0.0000 
 'International Tables Vol C Tables 4.2.6.8 and 6.1.1.4' 
 'F'  'F'   0.0171   0.0103 
 'International Tables Vol C Tables 4.2.6.8 and 6.1.1.4' 
 'Sb'  'Sb'  -0.5866   1.5461 
 'International Tables Vol C Tables 4.2.6.8 and 6.1.1.4' 
  
_symmetry_cell_setting            Monoclinic 
_symmetry_space_group_name_H-M    P2(1)/n 
_symmetry_space_group_name_Hall       '-P 2yn'
_symmetry_Int_Tables_number            14
  
loop_ 
 _symmetry_equiv_pos_as_xyz 
 'x, y, z' 
 '-x+1/2, y+1/2, -z+1/2' 
 '-x, -y, -z' 
 'x-1/2, -y-1/2, z-1/2' 
  
_cell_length_a                    10.0120(13) 
_cell_length_b                    21.486(3) 
_cell_length_c                    11.6831(16) 
_cell_angle_alpha                 90.00 
_cell_angle_beta                  100.848(2) 
_cell_angle_gamma                 90.00 
_cell_volume                      2468.3(6) 
_cell_formula_units_Z             4 
_cell_measurement_temperature     100(2) 
_cell_measurement_reflns_used     ? 
_cell_measurement_theta_min       ? 
_cell_measurement_theta_max       ? 
  
_exptl_crystal_description        prism 
_exptl_crystal_colour             'reddish orange' 
_exptl_crystal_size_max           0.10 
_exptl_crystal_size_mid           0.10 
_exptl_crystal_size_min           0.10 
_exptl_crystal_density_meas       ? 
_exptl_crystal_density_diffrn     1.661 
_exptl_crystal_density_method     'not measured' 
_exptl_crystal_F_000              1248 
_exptl_absorpt_coefficient_mu     1.180 
_exptl_absorpt_correction_type    empirical 
_exptl_absorpt_correction_T_min   0.8911 
_exptl_absorpt_correction_T_max   0.8911 
_exptl_absorpt_process_details    ? 
  
_exptl_special_details 
; 
 ? 
; 
  
_diffrn_ambient_temperature       100(2) 
_diffrn_radiation_wavelength      0.71073 
_diffrn_radiation_type            MoK\a 
_diffrn_radiation_source          'fine-focus sealed tube' 
_diffrn_radiation_monochromator   graphite 
_diffrn_measurement_device_type   'CCD area detector' 
_diffrn_measurement_method        'phi and omega scans' 
_diffrn_detector_area_resol_mean  ? 
_diffrn_standards_number          ? 
_diffrn_standards_interval_count  ? 
_diffrn_standards_interval_time   ? 
_diffrn_standards_decay_%         ? 
_diffrn_reflns_number             12263 
_diffrn_reflns_av_R_equivalents   0.0423 
_diffrn_reflns_av_sigmaI/netI     0.0549 
_diffrn_reflns_limit_h_min        -11 
_diffrn_reflns_limit_h_max        11 
_diffrn_reflns_limit_k_min        -25 
_diffrn_reflns_limit_k_max        17 
_diffrn_reflns_limit_l_min        -13 
_diffrn_reflns_limit_l_max        12 
_diffrn_reflns_theta_min          2.01 
_diffrn_reflns_theta_max          25.00 
_reflns_number_total              4333 
_reflns_number_gt                 3396 
_reflns_threshold_expression      >2sigma(I) 
  
_computing_data_collection        'Bruker SMART' 
_computing_cell_refinement        'Bruker SMART' 
_computing_data_reduction         'Bruker SHELXTL' 
_computing_structure_solution     'SHELXS-97 (Sheldrick, 1990)' 
_computing_structure_refinement   'SHELXL-97 (Sheldrick, 1997)' 
_computing_molecular_graphics     'Bruker SHELXTL' 
_computing_publication_material   'Bruker SHELXTL' 
  
_refine_special_details 
; 
 Refinement of F^2^ against ALL reflections.  The weighted R-factor wR and 
 goodness of fit S are based on F^2^, conventional R-factors R are based 
 on F, with F set to zero for negative F^2^. The threshold expression of 
 F^2^ > 2sigma(F^2^) is used only for calculating R-factors(gt) etc. and is 
 not relevant to the choice of reflections for refinement.  R-factors based 
 on F^2^ are statistically about twice as large as those based on F, and R- 
 factors based on ALL data will be even larger. 
; 
  
_refine_ls_structure_factor_coef  Fsqd 
_refine_ls_matrix_type            full 
_refine_ls_weighting_scheme       calc 
_refine_ls_weighting_details 
 'calc w=1/[\s^2^(Fo^2^)+(0.0300P)^2^+0.0000P] where P=(Fo^2^+2Fc^2^)/3' 
_atom_sites_solution_primary      direct 
_atom_sites_solution_secondary    difmap 
_atom_sites_solution_hydrogens    geom 
_refine_ls_hydrogen_treatment     constr 
_refine_ls_extinction_method      none 
_refine_ls_extinction_coef        ? 
_refine_ls_number_reflns          4333 
_refine_ls_number_parameters      325 
_refine_ls_number_restraints      0 
_refine_ls_R_factor_all           0.0558 
_refine_ls_R_factor_gt            0.0378 
_refine_ls_wR_factor_ref          0.0759 
_refine_ls_wR_factor_gt           0.0726 
_refine_ls_goodness_of_fit_ref    1.061 
_refine_ls_restrained_S_all       1.061 
_refine_ls_shift/su_max           0.001 
_refine_ls_shift/su_mean          0.000 
  
loop_ 
 _atom_site_label 
 _atom_site_type_symbol 
 _atom_site_fract_x 
 _atom_site_fract_y 
 _atom_site_fract_z 
 _atom_site_U_iso_or_equiv 
 _atom_site_adp_type 
 _atom_site_occupancy 
 _atom_site_symmetry_multiplicity 
 _atom_site_calc_flag 
 _atom_site_refinement_flags 
 _atom_site_disorder_assembly 
 _atom_site_disorder_group 
Sb1 Sb 0.23104(3) 0.166805(13) 0.01040(2) 0.02097(10) Uani 1 1 d . . . 
F1 F 0.3931(2) 0.20940(11) 0.0047(2) 0.0365(6) Uani 1 1 d . . . 
F5 F 0.1400(2) 0.21435(11) -0.1149(2) 0.0387(7) Uani 1 1 d . . . 
F3 F 0.1865(3) 0.22514(11) 0.1145(2) 0.0453(7) Uani 1 1 d . . . 
F4 F 0.0712(2) 0.12260(12) 0.0161(2) 0.0364(6) Uani 1 1 d . . . 
F2 F 0.3227(2) 0.11894(11) 0.1345(2) 0.0381(7) Uani 1 1 d . . . 
F6 F 0.2729(3) 0.10760(11) -0.0946(2) 0.0420(7) Uani 1 1 d . . . 
C17 C 1.0016(4) 0.09155(18) 0.2825(3) 0.0236(9) Uani 1 1 d . . . 
H17A H 1.0594 0.1051 0.2271 0.028 Uiso 1 1 calc R . . 
H17B H 1.0549 0.0623 0.3387 0.028 Uiso 1 1 calc R . . 
C8 C 0.7558(3) 0.15805(17) -0.0466(3) 0.0159(8) Uani 1 1 d . . . 
C10 C 0.7925(4) 0.10522(17) 0.1322(3) 0.0176(9) Uani 1 1 d . . . 
C16 C 0.8753(4) 0.05880(18) 0.2164(3) 0.0214(9) Uani 1 1 d . . . 
H16 H 0.9035 0.0232 0.1711 0.026 Uiso 1 1 calc R . . 
C12 C 0.6705(4) 0.14030(19) 0.1724(4) 0.0245(10) Uani 1 1 d . . . 
H12 H 0.5899 0.1483 0.1092 0.029 Uiso 1 1 calc R . . 
C7 C 0.7797(4) 0.20361(18) 0.0410(3) 0.0168(9) Uani 1 1 d . . . 
C11 C 0.8023(4) 0.17328(17) 0.1566(3) 0.0183(9) Uani 1 1 d . . . 
C29 C 0.5821(4) 0.03721(18) -0.1190(3) 0.0213(9) Uani 1 1 d . . . 
H29A H 0.5567 -0.0068 -0.1358 0.026 Uiso 1 1 calc R . . 
H29B H 0.5240 0.0535 -0.0661 0.026 Uiso 1 1 calc R . . 
C5 C 0.8363(4) 0.36545(19) -0.0590(3) 0.0212(9) Uani 1 1 d . . . 
H5 H 0.8751 0.3859 -0.1170 0.025 Uiso 1 1 calc R . . 
C25 C 0.7936(4) 0.06639(19) -0.2566(3) 0.0254(10) Uani 1 1 d . . . 
H25 H 0.8535 0.0514 -0.3103 0.030 Uiso 1 1 calc R . . 
C3 C 0.7235(4) 0.37065(18) 0.1046(3) 0.0200(9) Uani 1 1 d . . . 
H3 H 0.6848 0.3946 0.1585 0.024 Uiso 1 1 calc R . . 
C27 C 0.7327(4) 0.03992(17) -0.0556(3) 0.0199(9) Uani 1 1 d . . . 
H27 H 0.7478 0.0057 0.0035 0.024 Uiso 1 1 calc R . . 
C20 C 0.9011(4) 0.19838(18) 0.2609(3) 0.0217(9) Uani 1 1 d . . . 
H20A H 0.8535 0.2294 0.3014 0.026 Uiso 1 1 calc R . . 
H20B H 0.9762 0.2200 0.2330 0.026 Uiso 1 1 calc R . . 
C18 C 0.9610(4) 0.14807(17) 0.3476(3) 0.0210(9) Uani 1 1 d . . . 
H18 H 1.0456 0.1653 0.3966 0.025 Uiso 1 1 calc R . . 
C13 C 0.6376(4) 0.1259(2) 0.2901(4) 0.0277(10) Uani 1 1 d . . . 
H13A H 0.5510 0.1025 0.2786 0.033 Uiso 1 1 calc R . . 
H13B H 0.6230 0.1657 0.3288 0.033 Uiso 1 1 calc R . . 
C15 C 0.7927(4) 0.03414(19) 0.3036(4) 0.0264(10) Uani 1 1 d . . . 
H15A H 0.8493 0.0054 0.3588 0.032 Uiso 1 1 calc R . . 
H15B H 0.7130 0.0107 0.2620 0.032 Uiso 1 1 calc R . . 
C21 C 0.7115(4) 0.16809(18) -0.1767(3) 0.0187(8) Uani 1 1 d . . . 
H21 H 0.7130 0.2138 -0.1923 0.022 Uiso 1 1 calc R . . 
C26 C 0.8307(4) 0.02921(19) -0.1424(4) 0.0249(10) Uani 1 1 d . . . 
H26A H 0.9240 0.0407 -0.1035 0.030 Uiso 1 1 calc R . . 
H26B H 0.8311 -0.0157 -0.1615 0.030 Uiso 1 1 calc R . . 
C9 C 0.7616(3) 0.09952(17) 0.0063(3) 0.0162(8) Uani 1 1 d . . . 
C23 C 0.5529(4) 0.07388(18) -0.2326(3) 0.0231(10) Uani 1 1 d . . . 
H23 H 0.4573 0.0644 -0.2715 0.028 Uiso 1 1 calc R . . 
C6 C 0.8350(4) 0.30141(19) -0.0544(3) 0.0205(9) Uani 1 1 d . . . 
H6 H 0.8737 0.2779 -0.1089 0.025 Uiso 1 1 calc R . . 
C1 C 0.7771(4) 0.27068(18) 0.0300(3) 0.0172(9) Uani 1 1 d . . . 
C24 C 0.6463(4) 0.0514(2) -0.3133(4) 0.0294(10) Uani 1 1 d . . . 
H24A H 0.6227 0.0725 -0.3898 0.035 Uiso 1 1 calc R . . 
H24B H 0.6355 0.0060 -0.3261 0.035 Uiso 1 1 calc R . . 
C14 C 0.7443(4) 0.08894(19) 0.3711(4) 0.0265(10) Uani 1 1 d . . . 
H14 H 0.7002 0.0710 0.4337 0.032 Uiso 1 1 calc R . . 
C19 C 0.8666(4) 0.1272(2) 0.4304(3) 0.0265(10) Uani 1 1 d . . . 
H19A H 0.9201 0.1021 0.4941 0.032 Uiso 1 1 calc R . . 
H19B H 0.8333 0.1645 0.4660 0.032 Uiso 1 1 calc R . . 
C2 C 0.7223(4) 0.30669(19) 0.1102(3) 0.0200(9) Uani 1 1 d . . . 
H2 H 0.6838 0.2867 0.1689 0.024 Uiso 1 1 calc R . . 
C28 C 0.8120(4) 0.13595(18) -0.2445(3) 0.0230(9) Uani 1 1 d . . . 
H28A H 0.8004 0.1545 -0.3233 0.028 Uiso 1 1 calc R . . 
H28B H 0.9061 0.1447 -0.2039 0.028 Uiso 1 1 calc R . . 
C22 C 0.5654(4) 0.14447(18) -0.2197(3) 0.0210(9) Uani 1 1 d . . . 
H22A H 0.5080 0.1585 -0.1643 0.025 Uiso 1 1 calc R . . 
H22B H 0.5292 0.1639 -0.2961 0.025 Uiso 1 1 calc R . . 
C4 C 0.7813(4) 0.40001(19) 0.0204(3) 0.0204(9) Uani 1 1 d . . . 
H4 H 0.7832 0.4442 0.0172 0.024 Uiso 1 1 calc R . . 
  
loop_ 
 _atom_site_aniso_label 
 _atom_site_aniso_U_11 
 _atom_site_aniso_U_22 
 _atom_site_aniso_U_33 
 _atom_site_aniso_U_23 
 _atom_site_aniso_U_13 
 _atom_site_aniso_U_12 
Sb1 0.01673(14) 0.02568(16) 0.02179(15) 0.00293(13) 0.00689(10) 0.00222(13) 
F1 0.0237(13) 0.0423(17) 0.0436(16) 0.0112(12) 0.0066(12) -0.0078(12) 
F5 0.0332(14) 0.0448(17) 0.0361(16) 0.0188(12) 0.0015(12) 0.0089(12) 
F3 0.0558(18) 0.0416(17) 0.0431(17) -0.0141(13) 0.0209(15) 0.0032(14) 
F4 0.0194(13) 0.0525(18) 0.0373(15) 0.0080(12) 0.0049(12) -0.0094(12) 
F2 0.0317(14) 0.0423(17) 0.0367(16) 0.0181(12) -0.0032(12) -0.0014(12) 
F6 0.0484(17) 0.0387(16) 0.0437(17) -0.0074(12) 0.0207(14) 0.0055(13) 
C17 0.021(2) 0.024(2) 0.025(2) 0.0043(18) 0.0021(19) 0.0040(18) 
C8 0.0111(18) 0.018(2) 0.019(2) -0.0009(16) 0.0036(16) -0.0009(16) 
C10 0.016(2) 0.018(2) 0.020(2) -0.0012(17) 0.0067(17) -0.0023(17) 
C16 0.023(2) 0.018(2) 0.024(2) 0.0003(17) 0.0051(19) 0.0031(18) 
C12 0.018(2) 0.028(2) 0.028(2) 0.0008(19) 0.0057(19) 0.0051(18) 
C7 0.0089(18) 0.019(2) 0.023(2) 0.0024(17) 0.0044(16) 0.0000(16) 
C11 0.0163(19) 0.016(2) 0.023(2) 0.0009(17) 0.0052(17) 0.0023(17) 
C29 0.021(2) 0.018(2) 0.025(2) 0.0014(17) 0.0045(18) -0.0028(17) 
C5 0.018(2) 0.025(3) 0.020(2) 0.0021(18) 0.0022(18) -0.0031(18) 
C25 0.030(2) 0.024(3) 0.025(2) -0.0046(18) 0.015(2) 0.0048(19) 
C3 0.017(2) 0.022(3) 0.020(2) -0.0045(17) 0.0019(18) 0.0002(18) 
C27 0.022(2) 0.019(2) 0.019(2) 0.0012(17) 0.0037(17) 0.0022(17) 
C20 0.023(2) 0.023(2) 0.018(2) -0.0004(17) 0.0019(18) -0.0021(18) 
C18 0.019(2) 0.022(2) 0.021(2) -0.0011(17) -0.0003(18) -0.0009(17) 
C13 0.020(2) 0.038(3) 0.029(3) -0.002(2) 0.013(2) 0.000(2) 
C15 0.028(2) 0.024(3) 0.026(2) 0.0041(19) 0.001(2) -0.0057(19) 
C21 0.021(2) 0.019(2) 0.0155(19) -0.0006(18) 0.0022(16) -0.0015(19) 
C26 0.023(2) 0.022(2) 0.031(3) -0.0050(18) 0.010(2) 0.0037(18) 
C9 0.0081(19) 0.019(2) 0.023(2) -0.0007(17) 0.0076(17) 0.0023(16) 
C23 0.022(2) 0.025(2) 0.021(2) 0.0009(18) 0.0005(19) -0.0055(18) 
C6 0.017(2) 0.026(3) 0.019(2) -0.0027(18) 0.0030(18) 0.0007(18) 
C1 0.0107(19) 0.020(2) 0.019(2) -0.0011(16) -0.0005(17) 0.0011(16) 
C24 0.040(3) 0.028(3) 0.020(2) -0.0053(19) 0.006(2) -0.004(2) 
C14 0.027(2) 0.030(3) 0.025(2) 0.0067(19) 0.011(2) -0.003(2) 
C19 0.028(2) 0.032(3) 0.019(2) 0.0003(18) 0.0047(19) -0.001(2) 
C2 0.015(2) 0.025(2) 0.019(2) 0.0017(17) -0.0007(18) -0.0022(17) 
C28 0.021(2) 0.026(2) 0.023(2) 0.0002(18) 0.0073(19) 0.0011(18) 
C22 0.017(2) 0.025(2) 0.020(2) 0.0011(17) 0.0008(18) 0.0004(17) 
C4 0.018(2) 0.015(2) 0.026(2) -0.0005(17) -0.0031(19) -0.0012(17) 
  
_geom_special_details 
; 
 All esds (except the esd in the dihedral angle between two l.s. planes) 
 are estimated using the full covariance matrix.  The cell esds are taken 
 into account individually in the estimation of esds in distances, angles 
 and torsion angles; correlations between esds in cell parameters are only 
 used when they are defined by crystal symmetry.  An approximate (isotropic) 
 treatment of cell esds is used for estimating esds involving l.s. planes. 
; 
  
loop_ 
 _geom_bond_atom_site_label_1 
 _geom_bond_atom_site_label_2 
 _geom_bond_distance 
 _geom_bond_site_symmetry_2 
 _geom_bond_publ_flag 
Sb1 F3 1.858(2) . ? 
Sb1 F6 1.868(2) . ? 
Sb1 F2 1.871(2) . ? 
Sb1 F4 1.873(2) . ? 
Sb1 F5 1.874(2) . ? 
Sb1 F1 1.875(2) . ? 
C17 C16 1.524(5) . ? 
C17 C18 1.528(5) . ? 
C8 C9 1.398(5) . ? 
C8 C7 1.404(5) . ? 
C8 C21 1.517(5) . ? 
C10 C9 1.450(5) . ? 
C10 C11 1.490(5) . ? 
C10 C16 1.530(5) . ? 
C10 C12 1.580(5) . ? 
C16 C15 1.523(5) . ? 
C12 C13 1.506(5) . ? 
C12 C11 1.539(5) . ? 
C7 C1 1.447(5) . ? 
C7 C11 1.478(5) . ? 
C11 C20 1.516(5) . ? 
C29 C23 1.524(5) . ? 
C29 C27 1.551(5) . ? 
C5 C6 1.377(5) . ? 
C5 C4 1.381(5) . ? 
C25 C28 1.509(5) . ? 
C25 C24 1.533(6) . ? 
C25 C26 1.539(5) . ? 
C3 C2 1.376(5) . ? 
C3 C4 1.384(5) . ? 
C27 C9 1.472(5) . ? 
C27 C26 1.555(5) . ? 
C20 C18 1.525(5) . ? 
C18 C19 1.541(5) . ? 
C13 C14 1.513(6) . ? 
C15 C14 1.545(5) . ? 
C21 C22 1.540(5) . ? 
C21 C28 1.554(5) . ? 
C23 C22 1.527(5) . ? 
C23 C24 1.527(5) . ? 
C6 C1 1.400(5) . ? 
C1 C2 1.404(5) . ? 
C14 C19 1.528(6) . ? 
  
loop_ 
 _geom_angle_atom_site_label_1 
 _geom_angle_atom_site_label_2 
 _geom_angle_atom_site_label_3 
 _geom_angle 
 _geom_angle_site_symmetry_1 
 _geom_angle_site_symmetry_3 
 _geom_angle_publ_flag 
F3 Sb1 F6 179.05(12) . . ? 
F3 Sb1 F2 90.36(12) . . ? 
F6 Sb1 F2 89.81(12) . . ? 
F3 Sb1 F4 90.41(11) . . ? 
F6 Sb1 F4 88.65(11) . . ? 
F2 Sb1 F4 89.51(10) . . ? 
F3 Sb1 F5 90.13(12) . . ? 
F6 Sb1 F5 89.69(11) . . ? 
F2 Sb1 F5 179.48(12) . . ? 
F4 Sb1 F5 90.62(11) . . ? 
F3 Sb1 F1 90.57(11) . . ? 
F6 Sb1 F1 90.37(11) . . ? 
F2 Sb1 F1 89.69(10) . . ? 
F4 Sb1 F1 178.74(11) . . ? 
F5 Sb1 F1 90.17(10) . . ? 
C16 C17 C18 110.3(3) . . ? 
C9 C8 C7 108.5(3) . . ? 
C9 C8 C21 123.4(3) . . ? 
C7 C8 C21 127.5(3) . . ? 
C9 C10 C11 105.7(3) . . ? 
C9 C10 C16 125.7(3) . . ? 
C11 C10 C16 120.6(3) . . ? 
C9 C10 C12 108.2(3) . . ? 
C11 C10 C12 60.1(2) . . ? 
C16 C10 C12 118.4(3) . . ? 
C15 C16 C17 108.9(3) . . ? 
C15 C16 C10 111.1(3) . . ? 
C17 C16 C10 108.8(3) . . ? 
C13 C12 C11 122.9(4) . . ? 
C13 C12 C10 119.2(3) . . ? 
C11 C12 C10 57.0(2) . . ? 
C8 C7 C1 129.2(4) . . ? 
C8 C7 C11 109.6(3) . . ? 
C1 C7 C11 121.2(3) . . ? 
C7 C11 C10 105.3(3) . . ? 
C7 C11 C20 122.8(3) . . ? 
C10 C11 C20 120.8(3) . . ? 
C7 C11 C12 108.9(3) . . ? 
C10 C11 C12 62.9(2) . . ? 
C20 C11 C12 120.8(3) . . ? 
C23 C29 C27 114.0(3) . . ? 
C6 C5 C4 120.2(4) . . ? 
C28 C25 C24 109.8(3) . . ? 
C28 C25 C26 115.3(3) . . ? 
C24 C25 C26 108.8(3) . . ? 
C2 C3 C4 119.8(4) . . ? 
C9 C27 C29 110.5(3) . . ? 
C9 C27 C26 111.0(3) . . ? 
C29 C27 C26 111.0(3) . . ? 
C11 C20 C18 113.4(3) . . ? 
C20 C18 C17 109.9(3) . . ? 
C20 C18 C19 114.4(3) . . ? 
C17 C18 C19 109.4(3) . . ? 
C12 C13 C14 115.4(3) . . ? 
C16 C15 C14 109.8(3) . . ? 
C8 C21 C22 111.2(3) . . ? 
C8 C21 C28 110.6(3) . . ? 
C22 C21 C28 110.7(3) . . ? 
C25 C26 C27 114.1(3) . . ? 
C8 C9 C10 110.8(3) . . ? 
C8 C9 C27 125.3(3) . . ? 
C10 C9 C27 123.8(3) . . ? 
C29 C23 C22 115.4(3) . . ? 
C29 C23 C24 109.6(3) . . ? 
C22 C23 C24 109.1(3) . . ? 
C5 C6 C1 120.4(4) . . ? 
C6 C1 C2 118.4(4) . . ? 
C6 C1 C7 122.0(3) . . ? 
C2 C1 C7 119.5(3) . . ? 
C23 C24 C25 108.5(3) . . ? 
C13 C14 C19 114.4(3) . . ? 
C13 C14 C15 109.5(3) . . ? 
C19 C14 C15 109.9(3) . . ? 
C14 C19 C18 113.9(3) . . ? 
C3 C2 C1 120.7(4) . . ? 
C25 C28 C21 114.1(3) . . ? 
C23 C22 C21 114.5(3) . . ? 
C5 C4 C3 120.4(4) . . ? 
  
_diffrn_measured_fraction_theta_max    1.000 
_diffrn_reflns_theta_full              25.00 
_diffrn_measured_fraction_theta_full   1.000 
_refine_diff_density_max    1.335 
_refine_diff_density_min   -0.810 
_refine_diff_density_rms    0.100 
  
